# Supplementary material for: Evaluation of rice bacterial blight severity from lab to field with hyperspectral imaging technique
Source: Front Plant Sci. 2022 Oct 19;13:1037774. doi: 10.3389/fpls.2022.1037774 (PMC9627309; doi:10.3389/fpls.2022.1037774)
Supplement: Supplementary Table 1 — The common spectral indices and the calculation. [file DataSheet_2.xlsx]

## Sheet: Table S1
Table S1. Information of the experimental samples
Acquisition time	Cultivars	Lesion area ratio	Diseas severity
2021.09.09	3A26	0	0
2021.09.09	3A26	0	0
2021.09.09	3A26	0	0
2021.09.09	3A26	0	0
2021.09.09	3A26	0	0
2021.09.09	3A26	0	0
2021.09.09	3A26	0	0
2021.09.09	3A26	0	0
2021.09.09	3A26	0	0
2021.09.09	3A26	0	0
2021.09.09	3A26	0.0009	1
2021.09.09	3A26	0	0
2021.09.09	3A26	0	0
2021.09.09	3A26	3.31e-05	1
2021.09.09	3A26	0	0
2021.09.09	3A26	0	0
2021.09.09	3A26	0	0
2021.09.09	3A26	0	0
2021.09.09	3A26	0	0
2021.09.09	3A26	0	0
2021.09.09	IR24	0	0
2021.09.09	IR24	0	0
2021.09.09	IR24	0	0
2021.09.09	IR24	0	0
2021.09.09	IR24	0	0
2021.09.09	IR24	0.0068	1
2021.09.09	IR24	0.0067	1
2021.09.09	IR24	0.0019	1
2021.09.09	IR24	0	0
2021.09.09	IR24	0.0166	1
2021.09.09	IR24	0.0106	1
2021.09.09	IR24	0.0041	1
2021.09.09	IR24	0.0044	1
2021.09.09	IR24	0	0
2021.09.09	IR24	0	0
2021.09.09	IR24	0	0
2021.09.09	IR24	0	0
2021.09.09	IR24	0	0
2021.09.09	IR24	0	0
2021.09.09	IR24	0	0
2021.09.09	4A37	0	0
2021.09.09	4A37	0	0
2021.09.09	4A37	0	0
2021.09.09	4A37	0	0
2021.09.09	4A37	0	0
2021.09.09	4A37	0	0
2021.09.09	4A37	0	0
2021.09.09	4A37	0	0
2021.09.09	4A37	0	0
2021.09.09	4A37	0	0
2021.09.09	4A37	0	0
2021.09.09	4A37	0	0
2021.09.09	4A37	0	0
2021.09.09	4A37	0	0
2021.09.09	4A37	0	0
2021.09.09	4A37	0	0
2021.09.09	4A37	4.9872e-05	1
2021.09.09	4A37	0	0
2021.09.09	4A37	0	0
2021.09.09	4A37	0	0
2021.09.09	IR24	0.0201	1
2021.09.09	IR24	0.0103	1
2021.09.09	4A37	0.008	1
2021.09.09	3A26	0.017	1
2021.09.09	IR24	0.0223	1
2021.09.09	IR24	0.0269	1
2021.09.09	4A37	0.0001	1
2021.09.09	4A37	0	0
2021.09.09	3A26	0	0
2021.09.09	3A26	0	0
2021.09.09	3A26	0	0
2021.09.09	4A37	0	0
2021.09.09	IR24	0	0
2021.09.19	3A26	0.005	1
2021.09.19	3A26	0.0014	1
2021.09.19	3A26	0	0
2021.09.19	3A26	0.0069	1
2021.09.19	3A26	0.0079	1
2021.09.19	3A26	0.0053	1
2021.09.19	3A26	0.0112	1
2021.09.19	3A26	0.0019	1
2021.09.19	3A26	0.002	1
2021.09.19	3A26	0.0058	1
2021.09.19	3A26	0.0145	1
2021.09.19	3A26	0.0048	1
2021.09.19	IR24	0.006	1
2021.09.19	IR24	0.0138	1
2021.09.19	IR24	0.0159	1
2021.09.19	IR24	0.0006	1
2021.09.19	IR24	0.0095	1
2021.09.19	IR24	0.0142	1
2021.09.19	IR24	0.0172	1
2021.09.19	IR24	0.0234	1
2021.09.19	IR24	0.0156	1
2021.09.19	IR24	0.0249	1
2021.09.19	IR24	0.0075	1
2021.09.19	IR24	0.001	1
2021.09.19	4A37	0.0023	1
2021.09.19	4A37	0.0221	1
2021.09.19	4A37	0.005	1
2021.09.19	4A37	0.0038	1
2021.09.19	4A37	0.0062	1
2021.09.19	4A37	0.0048	1
2021.09.19	4A37	0.0041	1
2021.09.19	4A37	0.0085	1
2021.09.19	4A37	0.0062	1
2021.09.19	4A37	0.0112	1
2021.09.19	4A37	0.0045	1
2021.09.19	4A37	0.0087	1
2021.09.19	4A37	0.0155	1
2021.09.19	IR24	0.0322	1
2021.09.19	IR24	0.0391	1
2021.09.19	3A26	0.0146	1
2021.09.19	IR24	0.0416	1
2021.09.19	IR24	0.0465	1
2021.09.19	4A37	0.0276	1
2021.09.19	IR24	0.0533	1
2021.09.19	IR24	0.0432	1
2021.09.19	IR24	0.052	1
2021.09.19	IR24	0.0509	1
2021.09.19	IR24	0.0465	1
2021.09.19	IR24	0.0494	1
2021.09.19	IR24	0	0
2021.09.19	IR24	0	0
2021.09.19	3A26	0	0
2021.09.19	3A26	0	0
2021.09.19	3A26	0	0
2021.09.19	3A26	0	0
2021.09.19	3A26	0	0
2021.09.19	3A26	0	0
2021.09.19	3A26	0	0
2021.09.19	3A26	0	0
2021.09.19	3A26	0	0
2021.09.19	3A26	0	0
2021.09.19	3A26	0	0
2021.09.19	3A26	0	0
2021.09.19	3A26	0	0
2021.09.19	IR24	0	0
2021.09.19	IR24	0	0
2021.09.19	4A37	0	0
2021.09.19	4A37	0	0
2021.09.19	4A37	0	0
2021.09.19	4A37	0	0
2021.09.19	4A37	0	0
2021.09.19	4A37	0	0
2021.09.19	4A37	0	0
2021.09.19	4A37	0	0
2021.09.19	4A37	0	0
2021.09.19	4A37	0	0
2021.09.19	4A37	0	0
2021.09.19	4A37	0	0
2021.09.19	4A37	0	0
2021.10.09	3A26	0.0712	1
2021.10.09	3A26	0.0794	1
2021.10.09	3A26	0.0549	1
2021.10.09	3A26	0.019	1
2021.10.09	3A26	0.0735	1
2021.10.09	3A26	0.075	1
2021.10.09	3A26	0.0261	1
2021.10.09	3A26	0.076	1
2021.10.09	3A26	0.0355	1
2021.10.09	3A26	0.0256	1
2021.10.09	3A26	0.1476	2
2021.10.09	3A26	0.0332	1
2021.10.09	3A26	0.1191	2
2021.10.09	3A26	0.022	1
2021.10.09	IR24	0.1945	2
2021.10.09	IR24	0.3913	3
2021.10.09	IR24	0.0765	1
2021.10.09	IR24	0.1479	2
2021.10.09	IR24	0.0303	1
2021.10.09	IR24	0.2724	3
2021.10.09	IR24	0.2037	2
2021.10.09	IR24	0.1943	2
2021.10.09	IR24	0.0008	1
2021.10.09	IR24	0.1733	2
2021.10.09	IR24	0.247	2
2021.10.09	IR24	0.0135	1
2021.10.09	IR24	0.0379	1
2021.10.09	4A37	0.0997	1
2021.10.09	4A37	0.1006	2
2021.10.09	4A37	0.0573	1
2021.10.09	4A37	0.0489	1
2021.10.09	4A37	0.1914	2
2021.10.09	4A37	0.0754	1
2021.10.09	4A37	0.0902	1
2021.10.09	4A37	0.0856	1
2021.10.09	4A37	0.0453	1
2021.10.09	4A37	0.2078	2
2021.10.09	4A37	0.0022	1
2021.10.09	4A37	0.1169	2
2021.10.09	3A26	0.0753	1
2021.10.09	3A26	0.1128	2
2021.10.09	3A26	0.0675	1
2021.10.09	3A26	0.1149	2
2021.10.09	3A26	0.0668	1
2021.10.09	3A26	0.0682	1
2021.10.09	3A26	0.0654	1
2021.10.09	3A26	0.1009	2
2021.10.09	3A26	0.1003	2
2021.10.09	3A26	0.055	1
2021.10.09	3A26	0.0932	1
2021.10.09	3A26	0.0787	1
2021.10.09	3A26	0.086	1
2021.10.09	3A26	0.1127	2
2021.10.09	3A26	0.1132	2
2021.10.09	3A26	0.0551	1
2021.10.09	IR24	0.1176	2
2021.10.09	IR24	0.1005	2
2021.10.09	IR24	0.0745	1
2021.10.09	IR24	0.1044	2
2021.10.09	IR24	0.0765	1
2021.10.09	4A37	0.0676	1
2021.10.09	4A37	0.0834	1
2021.10.09	IR23	0.1132	2
2021.10.09	IR24	0.0704	1
2021.10.09	IR24	0.1097	2
2021.10.09	IR24	0.0583	1
2021.10.09	IR24	0.2004	3
2021.10.09	IR24	0.2193	3
2021.10.09	4A37	0.0719	1
2021.10.09	4A37	0.0668	1
2021.10.09	4A37	0.0637	1
2021.10.09	4A37	0.0779	1
2021.10.09	4A37	0.1244	2
2021.10.09	4A37	0.2183	3
2021.10.09	4A37	0.082	1
2021.10.09	4A37	0.0945	1
2021.10.09	4A37	0.0603	1
2021.10.09	4A37	0.0794	1
2021.10.09	4A37	0.0752	1
2021.10.09	4A37	0.0736	1
2021.10.09	4A37	0.0626	1
2021.10.09	IR24	0.203	3
2021.10.09	IR24	0.2	3
2021.10.09	IR24	0.1042	2
2021.10.09	IR24	0	0
2021.10.09	IR24	0	0
2021.10.09	IR24	0	0
2021.10.09	IR24	0	0
2021.10.09	IR24	0	0
2021.10.09	IR24	0	0
2021.10.09	IR24	0	0
2021.10.09	IR24	0	0
2021.10.09	IR24	0	0
2021.10.09	IR24	0	0
2021.10.09	3A26	0	0
2021.10.09	3A27	0	0
2021.10.09	3A28	0	0
2021.10.09	3A29	0	0
2021.10.09	3A30	0	0
2021.10.09	3A31	0	0
2021.10.09	3A32	0	0
2021.10.09	3A33	0	0
2021.10.09	3A34	0	0
2021.10.09	3A35	0	0
2021.10.09	4A37	0	0
2021.10.09	4A37	0	0
2021.10.09	4A37	0	0
2021.10.09	4A37	0	0
2021.10.09	4A37	0	0
2021.10.09	4A37	0	0
2021.10.09	4A37	0	0
2021.10.09	4A37	0	0
2021.10.09	4A37	0	0
2021.10.09	4A37	0	0
2021.10.15	3A26	0.2753	3
2021.10.15	3A26	0.0537	1
2021.10.15	3A26	0.0927	1
2021.10.15	3A26	0.0831	1
2021.10.15	3A26	0.1246	2
2021.10.15	3A26	0.0758	1
2021.10.15	3A26	0.0761	1
2021.10.15	3A26	0.171	2
2021.10.15	3A26	0.0556	1
2021.10.15	3A26	0.0549	1
2021.10.15	3A26	0.1071	2
2021.10.15	3A26	0.0448	1
2021.10.15	3A26	0.1432	2
2021.10.15	3A26	0.0497	1
2021.10.15	3A26	0.0801	1
2021.10.15	3A26	0.1347	2
2021.10.15	IR24	0.0689	1
2021.10.15	IR24	0.014	1
2021.10.15	IR24	0.2249	2
2021.10.15	IR24	0.1644	2
2021.10.15	IR24	0.0237	1
2021.10.15	IR24	0.3165	3
2021.10.15	IR24	0.0172	1
2021.10.15	IR24	0.2022	2
2021.10.15	IR24	0.2145	2
2021.10.15	IR24	0.1812	2
2021.10.15	IR24	0.035	1
2021.10.15	IR24	0.0115	1
2021.10.15	IR24	0.235	2
2021.10.15	IR24	0.4006	3
2021.10.15	4A37	0.1867	2
2021.10.15	4A37	0.0829	1
2021.10.15	4A37	0.1104	2
2021.10.15	4A37	0.1423	2
2021.10.15	4A37	0.156	2
2021.10.15	4A37	0.2913	3
2021.10.15	4A37	0.0671	1
2021.10.15	4A37	0.1285	2
2021.10.15	4A37	0.1285	2
2021.10.15	4A37	0.1428	2
2021.10.15	4A37	0.074	1
2021.10.15	4A37	0.2156	2
2021.10.15	4A37	0.0884	1
2021.10.15	4A37	0.2727	3
2021.10.15	IR24	0.2481	3
2021.10.15	IR24	0.1451	2
2021.10.15	IR24	0.1406	2
2021.10.15	IR24	0.1524	2
2021.10.15	IR24	0.4829	3
2021.10.15	IR24	0.8708	5
2021.10.15	IR24	0.8868	5
2021.10.15	IR24	0.1595	2
2021.10.15	IR24	0.3579	3
2021.10.15	IR24	0.1758	2
2021.10.15	IR24	0.622	4
2021.10.15	IR24	0.4697	3
2021.10.15	IR24	0.7587	5
2021.10.15	4A37	0.1451	2
2021.10.15	4A37	0.1379	2
2021.10.15	4A37	0.1317	2
2021.10.15	4A37	0.3155	3
2021.10.15	4A37	0.1995	2
2021.10.15	4A37	0.2656	3
2021.10.15	4A37	0.3229	3
2021.10.15	4A37	0.4046	3
2021.10.15	4A37	0.2333	3
2021.10.15	4A37	0.3099	3
2021.10.15	4A37	0.2587	3
2021.10.15	4A37	0.1308	2
2021.10.15	4A37	0.2508	3
2021.10.15	4A37	0.2783	3
2021.10.15	4A37	0.1997	2
2021.10.15	4A37	0.2364	3
2021.10.15	IR24	0.2476	3
2021.10.15	IR24	0.2607	3
2021.10.15	IR24	0.386	3
2021.10.15	3A26	0.0906	1
2021.10.15	3A26	0.1931	2
2021.10.15	3A26	0.1286	2
2021.10.15	3A26	0.1318	2
2021.10.15	3A26	0.1627	2
2021.10.15	3A26	0.1297	2
2021.10.15	3A26	0.1429	2
2021.10.15	3A26	0.1955	2
2021.10.15	3A26	0.1798	2
2021.10.15	3A26	0.4547	3
2021.10.15	3A26	0.1768	2
2021.10.15	3A26	0.1247	2
2021.10.15	3A26	0.1565	2
2021.10.15	3A26	0.1364	2
2021.10.15	3A26	0.1544	2
2021.10.15	3A26	0.2815	3
2021.10.15	3A26	0.3335	3
2021.10.15	3A26	0.2572	3
2021.10.15	3A26	0.2888	3
2021.10.15	3A26	0.2656	3
2021.10.15	4A37	0.4097	3
2021.10.15	4A37	0.1919	2
2021.10.15	4A37	0.3341	3
2021.10.15	4A37	0.4236	3
2021.10.15	4A37	0.3244	3
2021.10.15	4A37	0.0896	1
2021.10.15	4A37	0.1316	2
2021.10.15	4A37	0.254	3
2021.10.15	4A37	0.1787	2
2021.10.15	4A37	0.1308	2
2021.10.15	4A37	0.4385	3
2021.10.15	4A37	0.3261	3
2021.10.15	4A37	0.3052	3
2021.10.15	IR24	0.3516	3
2021.10.15	IR24	0.5385	4
2021.10.15	IR24	0.3118	3
2021.10.15	IR24	0.7529	5
2021.10.15	IR24	0.8127	5
2021.10.15	3A26	0.4383	3
2021.10.15	3A26	0.3663	3
2021.10.15	3A26	0.539	4
2021.10.15	3A26	0.2835	3
2021.10.15	3A26	0.1995	2
2021.10.15	IR24	0.2876	3
2021.10.15	IR24	0.5208	4
2021.10.15	IR24	0.4152	3
2021.10.15	3A26	0.184	2
2021.10.15	IR24	0.3382	3
2021.10.15	3A26	0.2962	3
2021.10.15	IR24	0	0
2021.10.15	IR24	0	0
2021.10.15	IR24	0	0
2021.10.15	IR24	0	0
2021.10.15	IR24	0	0
2021.10.15	IR24	0	0
2021.10.15	IR24	0	0
2021.10.15	IR24	0	0
2021.10.15	IR24	0	0
2021.10.15	IR24	0	0
2021.10.15	3A26	0	0
2021.10.15	3A27	0	0
2021.10.15	3A28	0	0
2021.10.15	3A29	0	0
2021.10.15	3A30	0	0
2021.10.15	3A31	0	0
2021.10.15	3A32	0	0
2021.10.15	3A33	0	0
2021.10.15	3A34	0	0
2021.10.15	3A35	0	0
2021.10.15	4A37	0	0
2021.10.15	4A37	0	0
2021.10.15	4A37	0	0
2021.10.15	4A37	0	0
2021.10.15	4A37	0	0
2021.10.15	4A37	0	0
2021.10.15	4A37	0	0
2021.10.15	4A37	0	0
2021.10.15	4A37	0	0
2021.10.15	4A37	0	0
2021.10.15	IR24	0.7529	5
2021.10.15	IR24	0.8127	5
2021.10.15	IR24	0.539	4
2021.10.15	IR24	0.8708	5
2021.10.15	IR24	0.8871	5
2021.10.15	IR24	0.4697	3
2021.10.15	IR24	0.7587	5
2021.10.15	IR24	0.3155	3
2021.10.15	IR24	0.4169	3
2021.10.15	IR24	0.3229	3
2021.10.15	3A26	0.4547	3
2021.10.15	3A26	0.3341	3
2021.10.15	3A26	0.4159	3
2021.10.15	3A26	0.4236	3
2021.10.15	3A26	0.3244	3
2021.10.15	IR24	0.5385	4
2021.10.15	IR24	0.5554	4
2021.10.15	3A26	0.3341	3
2021.10.15	3A26	0.5208	4
2021.10.15	3A26	0.524	4
2021.10.15	3A26	0.385	3
2021.10.15	IR24	0.5093	4
2021.10.15	4A37	0.2949	3
2021.10.15	4A37	0.4547	3
2021.10.15	4A37	0.4097	3
2021.10.15	4A37	0.4873	3
2021.10.15	4A37	0.4483	3
2021.10.15	4A37	0.4869	3
2021.10.15	4A37	0.3482	3

## Sheet: Table S2
Table S2. The common spectral indices and the calculation.
Spectral Index	Formula
Normalized Difference Vegetation Index (NDVI)	RNIR-Rred/RNIR+Rred
Renormalized Difference Vegetation Index (RDVI)	(RNIR-Rred)/sqrt(RNIR+Rred)
Red-edge Vegetaion Stress Index (RVSI)	R714-R752/(2-R733)
Red-edge chlorophyll index (CIred-edge)	(RNIR/Rred-edge)-1
Green chlorophyll index CIgreen	(R783/R560)-1
MERIS terrestrial chlorophyll index (MTCI)	(RNIR-Rred-edge)/(Rred-edge-Rred)
Transformed Chlorophyll Absorption in Reflectance Index (TCARI)	3*[R700-R670-0.2*(R700-R550)*R700/R670]
Green Normalization Difference Vegetation Index (GNDVI)	R800-R550/800+R550
Optimized Soil Adjusted Vegetation Index (OSAVI)	1.16*(R800-R670)/(R800+R670+0.16)
Photochemical Reflectance Index (PRI)	R531-R570/R531+R570
Enhanced Vegetation Index (EVI)	2.5*(R796-R679)./(1+R796+2.4*R679)
Water index (WI)	R900/R970
R represents the reflectance in the corresponding band.

## Sheet: Table S3
Table S3. Values of color features with different disease severity.
Disease severity	First-order moment									Second-order moment									Third-order moment
	R component			G component			B component			R component			G component			B component			R component			G component			B component
	Aver1	SD2	Sig3	Aver	SD	Sig	Aver	SD	Sig	Aver	SD	Sig	Aver	SD	Sig	Aver	SD	Sig	Aver	SD	Sig	Aver	SD	Sig	Aver	SD	Sig
0	109.864	12.6779	a	101.448	15.3919	a	116.072	6.93492	a	78.8229	4.82509	a	97.731	3.63839	a	68.052	2.54895	a	54.4464	13.38	d	70.2935	15.5566	b	44.7922	8.64075	d
1	65.7014	30.0417	b	88.2834	16.3173	b	97.3995	18.2413	b	57.4669	12.8374	b	91.5585	9.0103	b	61.5994	7.2849	b	61.7208	9.26676	c	73.3383	14.3016	ab	51.7583	8.22242	c
2	32.2096	7.25886	d	63.7162	12.629	c	57.8187	13.8473	c	49.7884	4.49734	c	72.9263	9.82547	de	49.8371	5.6936	d	72.4517	2.42905	b	71.0077	10.1607	ab	62.8492	3.9308	b
3	36.6258	6.95702	cd	57.4528	11.2859	c	49.9507	9.40219	d	59.0722	6.18295	b	72.6906	8.7811	e	55.2584	5.7947	c	78.9302	3.93183	a	76.9033	5.9822	a	71.9457	5.54167	a
4	54.323	8.30931	bc	68.8564	9.97031	c	55.4895	7.85755	cd	76.1257	4.933	a	80.1618	6.76563	cd	65.1693	5.97757	ab	86.372	4.31329	a	76.7842	5.59216	ab	78.8801	7.0426	a
5	62.5201	15.5034	b	65.2843	13.763	c	58.9593	14.4418	cd	82.6427	6.78025	a	82.9566	4.23449	c	67.5108	9.18607	a	85.1396	7.10582	a	82.2194	10.5317	ab	77.0083	5.39616	a
1 Mean represents the mean value of all samples in the corresponding disease severity; 2 SD represents the standard deviation; 3 Different letters represents the significance among different disease severity. Analysis of variance followed by Tukey test was used, and different letters indicate significant differences.

## Sheet: Table S4
Table S4-1.The calibration results of ATT-LSTM and SVM models by using spectral data and color features.
Model	Spectral data						Color features
	Acc.	Paremeters	Classa	Pre.	Rec.	F1.	Acc.	Paremeters	Class	Pre.	Rec.	F1.
ATT-LSTM	0.97	/	0	0.98	0.93	0.95	0.92	/	0	0.82	0.98	0.89
			1	0.93	0.97	0.95			1	0.94	0.79	0.86
			2	0.94	0.96	0.95			2	0.91	0.84	0.87
			3	0.96	0.96	0.96			3	0.91	0.93	0.92
			4	1	1	1			4	1	1	1
			5	1	1	1			5	1	1	1
SVM	0.96	c=1000000, g=0.001	0	0.92	0.95	0.93	0.93	c=1000.0, g=0.0001	0	0.81	0.99	0.89
			1	0.95	0.89	0.91			1	0.97	0.77	0.86
			2	0.9	0.98	0.94			2	0.9	0.94	0.92
			3	0.98	0.94	0.96			3	0.96	0.91	0.93
			4	1	1	1			4	1	1	1
			5	1	1	1			5	1	1	1
Acc.: Accuracy; Pre.: Precision; Rec.: Recall; F1.: F1-score; “c” and “g” are the c and gamma value for SVM. a Class represents the label of the disease severity
Table S4-2. The calibration results of ATT-LSTM and SVM models by fusing spectral data and color features.
Classa	ATT-LSTM				Class	SVM
	Pre.	Rec.	F1.	Acc.		Pre.	Rec.	F1.	Paremeters	Acc.
0	0.92	0.98	0.95	0.92	0	0.93	1	0.96	c=100.0, g=1.0	0.99
1	0.92	0.91	0.92		1	1	0.91	0.95
2	0.98	0.84	0.9		2	0.98	1	0.99
3	0.93	0.98	0.95		3	1	1	1
4	0.83	0.83	0.83		4	1	1	1
5	1	1	1		5	1	1	1
Acc.: Accuracy; Pre.: Precision; Rec.: Recall; F1.: F1-score; “c” and “g” are the c and gamma value for SVM. a Class represents the label of the disease severity

## Sheet: Table S5
Table S5-1.The results of disease severity evaluation models established using the selected important wavelengths by the attention method.
Model	Paremeters	Classa	Clibration				Class	Prediction
			Pre.	Rec.	F1.	Acc.		Pre.	Rec.	F1.	Acc.
ATT-LSTM	nn=16	0	0.95	0.94	0.95	0.94	0	0.98	0.96	0.97	0.89
		1	0.91	0.89	0.9		1	0.93	0.95	0.94
		2	0.84	0.89	0.86		2	0.85	0.85	0.85
		3	0.94	0.94	0.94		3	0.88	0.92	0.9
		4	0.88	1	0.93		4	1	0.67	0.8
		5	1	1	1		5	1	1	1
SVM	c=100000.0, g=0.1	0	0.92	0.96	0.94	0.95	0	0.94	1	0.97	0.87
		1	0.92	0.85	0.88		1	0.97	0.9	0.94
		2	0.85	0.89	0.87		2	0.77	0.85	0.81
		3	0.96	0.98	0.97		3	0.86	0.79	0.83
		4	1	1	1		4	0.67	0.67	0.67
		5	1	1	1		5	1	1	1
Acc.: Accuracy; Pre.: Precision; Rec.: Recall; F1.: F1-score; nn is the number of neurons in the first dense layer of the attention block.; “c” and “g” are the c and gamma value for SVM. a Class represents the label of the disease severity
Table S5-2.The results of disease severity evaluation models established using the selected important wavelengths by UFS.
Model	Paremeters	Classa	Clibration				Class	Prediction
			Pre.	Rec.	F1.	Acc.		Pre.	Rec.	F1.	Acc.
ATT-LSTM	nn=16	0	0.8	0.9	0.85	0.9	0	0.85	0.89	0.87	0.84
		1	0.86	0.68	0.76		1	0.85	0.79	0.81
		2	0.75	0.96	0.84		2	0.81	0.85	0.83
		3	0.98	0.87	0.92		3	0.88	0.88	0.88
		4	1	1	1		4	0.67	0.67	0.67
		5	1	1	1		5	1	1	1
SVM	c=100000000.0, g=1.0	0	0.88	0.92	0.9	0.93	0	0.91	0.91	0.91	0.85
		1	0.88	0.82	0.85		1	0.86	0.9	0.88
		2	0.87	0.89	0.88		2	0.88	0.7	0.78
		3	0.96	0.96	0.96		3	0.81	0.92	0.86
		4	1	1	1		4	1	0.67	0.8
		5	1	1	1		5	1	1	1
Acc.: Accuracy; Pre.: Precision; Rec.: Recall; F1.: F1-score; nn is the number of neurons in the first dense layer of the attention block.; “c” and “g” are the c and gamma value for SVM. a Class represents the label of the disease severity
Table S5-3.The results of disease severity evaluation models established using the selected important wavelengths by RFE.
Model	Paremeters	Classa	Clibration				Class	Prediction
			Pre.	Rec.	F1.	Acc.		Pre.	Rec.	F1.	Acc.
ATT-LSTM	nn=16	0	0.94	0.93	0.94	0.94	0	0.98	1	0.99	0.88
		1	0.89	0.93	0.91		1	0.91	0.98	0.94
		2	0.95	0.83	0.88		2	0.88	0.7	0.78
		3	0.93	0.96	0.95		3	0.88	0.92	0.9
		4	0.88	1	0.93		4	1	0.67	0.8
		5	1	1	1		5	1	1	1
SVM	c=100000.0, g=0.01	0	0.93	0.95	0.94	0.95	0	0.94	0.98	0.96	0.85
		1	0.92	0.91	0.91		1	0.9	0.9	0.9
		2	0.91	0.89	0.9		2	0.82	0.7	0.76
		3	0.96	0.96	0.96		3	0.84	0.88	0.86
		4	1	1	1		4	0.67	0.67	0.67
		5	1	1	1		5	1	1	1
Acc.: Accuracy; Pre.: Precision; Rec.: Recall; F1.: F1-score; nn is the number of neurons in the first dense layer of the attention block.; “c” and “g” are the c and gamma value for SVM. a Class represents the label of the disease severity

## Sheet: Table S6
Table S6-1.The results of disease severity evaluation models established using the selected important wavelengths by the attention method fused with color features.
Model	Paremeters	Classa	Clibration				Class	Prediction
			Pre.	Rec.	F1.	Acc.		Pre.	Rec.	F1.	Acc.
ATT-LSTM	nn=16	0	0.94	0.95	0.95	0.96	0	0.97	0.95	0.96	0.94
		1	0.92	0.92	0.92		1	0.93	0.9	0.92
		2	0.92	0.92	0.92		2	0.76	0.81	0.79
		3	0.98	0.94	0.96		3	0.92	0.96	0.94
		4	0.86	1	0.92		4	1	1	1
		5	1	1	1		5	1	1	1
SVM	c=10000000.0, g=0.001	0	0.9	0.99	0.94	0.97	0	0.97	0.97	0.97	0.91
		1	0.98	0.88	0.93		1	0.95	0.9	0.93
		2	0.96	0.96	0.96		2	0.69	0.69	0.69
		3	0.98	0.98	0.98		3	0.85	0.92	0.88
		4	1	1	1		4	1	1	1
		5	1	1	1		5	1	1	1
Acc.: Accuracy; Pre.: Precision; Rec.: Recall; F1.: F1-score; nn is the number of neurons in the first dense layer of the attention block.; “c” and “g” are the c and gamma value for SVM. a Class represents the label of the disease severity
Table S6-2.The results of disease severity evaluation models established using the selected important wavelengths by UFS fused with color features.
Model	Paremeters	Classa	Clibration				Class	Prediction
			Pre.	Rec.	F1.	Acc.		Pre.	Rec.	F1.	Acc.
ATT-LSTM	nn=16	0	0.85	0.93	0.89	0.95	0	0.88	0.97	0.93	0.93
		1	0.91	0.82	0.86		1	0.97	0.83	0.9
		2	0.92	0.98	0.95		2	0.82	0.88	0.85
		3	1	0.96	0.98		3	0.92	0.96	0.94
		4	1	1	1		4	1	1	1
		5	1	1	1		5	1	1	1
SVM	c=10000000.0, g=0.01	0	0.92	0.98	0.95	0.98	0	0.97	0.95	0.96	0.91
		1	0.98	0.92	0.95		1	0.93	0.95	0.94
		2	1	1	1		2	0.83	0.62	0.71
		3	1	1	1		3	0.82	0.96	0.88
		4	1	1	1		4	1	1	1
		5	1	1	1		5	1	1	1
Acc.: Accuracy; Pre.: Precision; Rec.: Recall; F1.: F1-score; nn is the number of neurons in the first dense layer of the attention block.; “c” and “g” are the c and gamma value for SVM. a Class represents the label of the disease severity
Table S6-3.The results of disease severity evaluation models established using the selected important wavelengths by RFE fused with color features.
Model	Paremeters	Classa	Clibration				Class	Prediction
			Pre.	Rec.	F1.	Acc.		Pre.	Rec.	F1.	Acc.
ATT-LSTM	nn=16	0	0.94	0.93	0.94	0.93	0	0.97	0.92	0.95	0.93
		1	0.91	0.92	0.92		1	0.91	0.95	0.93
		2	0.92	0.94	0.93		2	0.86	0.75	0.8
		3	0.96	0.96	0.96		3	0.88	0.96	0.92
		4	1	0.83	0.91		4	1	1	1
		5	1	1	1		5	1	1	1
SVM	c=100000.0 g=0.01	0	0.91	0.98	0.95	0.97	0	0.95	0.95	0.95	0.91
		1	0.98	0.89	0.93		1	0.9	0.9	0.9
		2	0.96	0.96	0.96		2	0.73	0.69	0.71
		3	0.96	1	0.98		3	0.88	0.92	0.9
		4	1	1	1		4	1	1	1
		5	1	1	1		5	1	1	1
Acc.: Accuracy; Pre.: Precision; Rec.: Recall; F1.: F1-score; nn is the number of neurons in the first dense layer of the attention block.; “c” and “g” are the c and gamma value for SVM. a Class represents the label of the disease severity

## Sheet: Table S7
Table S7. The confusion matrix of correlation coefficient between disease severity and color features. * indicates p<0.05 (p less than 0.05 was considered to be statistically significant at the signifcance level of 95%)
Variable	Disease everity	Rmean	Gmean	Bmean	Rvar	Gvar	Bvar	Rske	Gske	Bske
Disease everity	1	*	*	*	*	*	*	*	*	*
Rmean	-0.74103	1	*	*	*	*	*	*	*
Gmean	-0.75413	0.84049	1	*	*	*	*	*	*	*
Bmean	-0.84339	0.89115	0.90937	1	*	*	*	*	*	*
Rvar	-0.49147	0.81773	0.5071	0.57206	1	*	*	*	*
Gvar	-0.74184	0.85951	0.86725	0.87575	0.64603	1	*	*	*
Bvar	-0.58488	0.81316	0.65889	0.71345	0.80108	0.75049	1	*	*
Rske	0.7971	-0.70541	-0.85879	-0.88466	-0.26422	-0.75823	-0.4873	1	*	*
Gske	0.12716	-0.0924	-0.41341	-0.18062	0.0821	-0.02595	0.04481	0.37747	1	*
Bske	0.83944	-0.74456	-0.89528	-0.92947	-0.34544	-0.79027	-0.47657	0.94297	0.36223	1

## Sheet: Table S8
Table S8. Information of the data acquired by UAV platform
Acquisition time	Location	Cultivars	Resistance	Disease severity
2021.09.25	Longyou	ASH1	MR	3
2021.09.25	Longyou	ASH2	LR	5
2021.09.25	Longyou	ASH3	R	3
2021.09.25	Longyou	ASH5	MR	2
2021.09.25	Longyou	ASH6	MR	2.66667
2021.09.25	Longyou	ASH7	R	1
2021.09.25	Longyou	ASH8	MR	5
2021.09.25	Longyou	ASH9	R	3
2021.09.25	Longyou	ASH11	MR	5
2021.09.25	Longyou	ASH12	MR	5
2021.09.25	Longyou	ASH13	R	3
2021.09.25	Longyou	ASH14	LR	5
2021.09.25	Longyou	ASH15	MR	3
2021.09.25	Longyou	ASH17	R	2.33333
2021.09.25	Longyou	ASH18	MR	5
2021.09.25	Longyou	ASH19	R	1.33333
2021.09.25	Longyou	ASH21	R	3
2021.09.25	Longyou	ASH23	R	3
2021.09.25	Longyou	ASH24	MR	5
2021.09.25	Longyou	ASH25	LR	5
2021.09.25	Longyou	ASH26	LR	5
2021.09.25	Longyou	ASH27	R	3.33333
2021.09.25	Longyou	ASH29	R	1
2021.09.25	Longyou	ASH30	MR	4
2021.09.25	Longyou	ASH31	MR	4.33333
2021.09.25	Longyou	ASH32	MR	5
2021.09.25	Longyou	ASH33	MR	3
2021.09.25	Longyou	ASH34	MR	5
2021.09.25	Longyou	ASH35	MR	5
2021.09.25	Longyou	ASH36	MR	5
2021.09.25	Longyou	ASH37	R	1.33333
2021.09.25	Longyou	ASH38	MR	5
2021.09.25	Longyou	ASH39	R	3.33333
2021.09.25	Longyou	ASH40	LR	5
2021.09.25	Longyou	ASH41	R	3
2021.09.25	Longyou	ASH42	MR	5
2021.09.25	Longyou	ASH43	MR	3
2021.09.25	Longyou	ASH44	MR	4
2021.09.25	Longyou	ASH45	MR	5
2021.09.25	Longyou	ASH46	R	1.33333
2021.09.25	Longyou	ASH47	R	2
2021.09.25	Longyou	ASH48	R	4
2021.09.25	Longyou	ASH49	MR	2
2021.09.25	Longyou	ASH50	MR	3
2021.09.25	Longyou	ASH51	R	2.33333
2021.09.25	Longyou	ASH52	MR	5
2021.09.25	Longyou	ASH53	MR	4
2021.09.25	Longyou	ASH54	MR	4
2021.09.25	Longyou	ASH55	R	2
2021.09.25	Longyou	ASH56	MR	4
2021.09.25	Longyou	ASH57	MR	5
2021.09.25	Longyou	ASH58	MR	4
2021.09.25	Longyou	ASH59	MR	3
2021.09.25	Longyou	ASH60	MR	4
